# Supplementary material for: Sinensetin attenuates IL-1β-induced cartilage damage and ameliorates osteoarthritis by regulating SERPINA3
Source: Royal Society of Chemistry journal article supplement (doi:10.1039/d2fo01304e), 2022-01-01

### OARSI score

| OARSI score |          |          |          |
|-------------|----------|----------|----------|
|             | Sham     | OA       | SIN      |
|             | 1        | 8        | 4        |
|             | 0        | 9        | 2        |
|             | 0        | 8        | 3        |
|             | 2        | 9        | 3        |
|             | 1        | 6        | 4        |
|             | 0        | 8        | 6        |
|             | Sham     | OA       | SIN      |
| Mean        | 0.666667 | 8        | 3.666667 |
| SD          | 0.816497 | 1.095445 | 1.36626  |

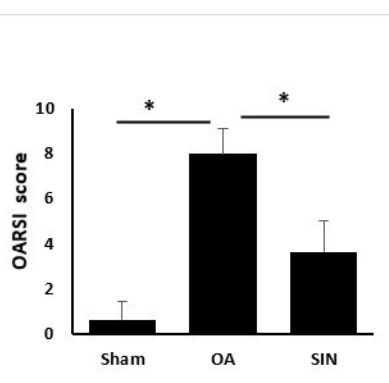

### Immunohistochemical

| The positive of MMP-13(%) |          |          |          |
|---------------------------|----------|----------|----------|
|                           | Sham     | OA       | SIN      |
|                           | 0.265    | 0.729    | 0.479    |
|                           | 0.267    | 0.574    | 0.378    |
|                           | 0.512    | 0.511    | 0.472    |
|                           | 0.342    | 0.489    | 0.356    |
|                           | 0.157    | 0.558    | 0.281    |
|                           | 0.213    | 0.725    | 0.419    |
|                           | Sham     | OA       | SIN      |
| Mean                      | 0.292667 | 0.597667 | 0.3975   |
| SD                        | 0.123869 | 0.1048   | 0.075272 |

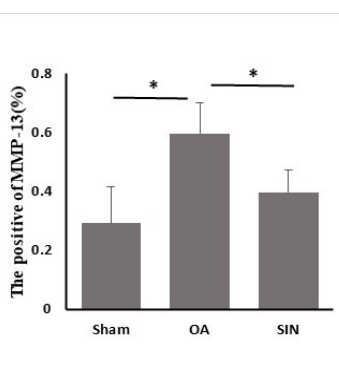

| The positive of collagen-II (%) |          |          |          |
|---------------------------------|----------|----------|----------|
|                                 | Sham     | OA       | SIN      |
|                                 | 0.589    | 0.192    | 0.319    |
|                                 | 0.639    | 0.339    | 0.486    |
|                                 | 0.474    | 0.219    | 0.419    |
|                                 | 0.509    | 0.271    | 0.356    |
|                                 | 0.758    | 0.255    | 0.475    |
|                                 | 0.514    | 0.267    | 0.436    |
|                                 | Sham     | OA       | SIN      |
| Mean                            | 0.5805   | 0.257167 | 0.415167 |
| SD                              | 0.105714 | 0.050384 | 0.066022 |

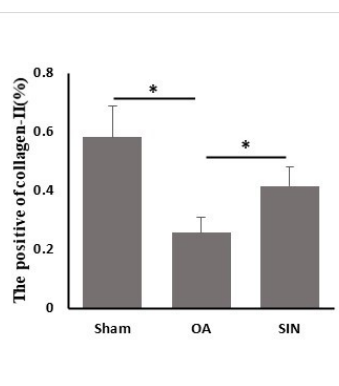

| The positive of AACT(%) |          |          |          |
|-------------------------|----------|----------|----------|
|                         | Sham     | OA       | SIN      |
|                         | 0.251    | 0.241    | 0.413    |
|                         | 0.387    | 0.255    | 0.627    |
|                         | 0.404    | 0.267    | 0.648    |
|                         | 0.388    | 0.206    | 0.822    |
|                         | 0.347    | 0.411    | 0.631    |
|                         | 0.368    | 0.249    | 0.741    |
|                         | Sham     | OA       | SIN      |
| Mean                    | 0.3575   | 0.2715   | 0.647    |
| SD                      | 0.055723 | 0.071386 | 0.137749 |

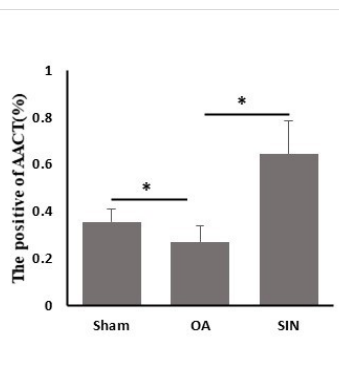

Supplement: d2fo01304e1.pdf [file d2fo01304e1.pdf]
