# Supplementary material for: Sinensetin attenuates IL-1β-induced cartilage damage and ameliorates osteoarthritis by regulating SERPINA3
Source: Royal Society of Chemistry journal article supplement (doi:10.1039/d2fo01304e), 2022-01-01

**Fig-3 Western blotting**

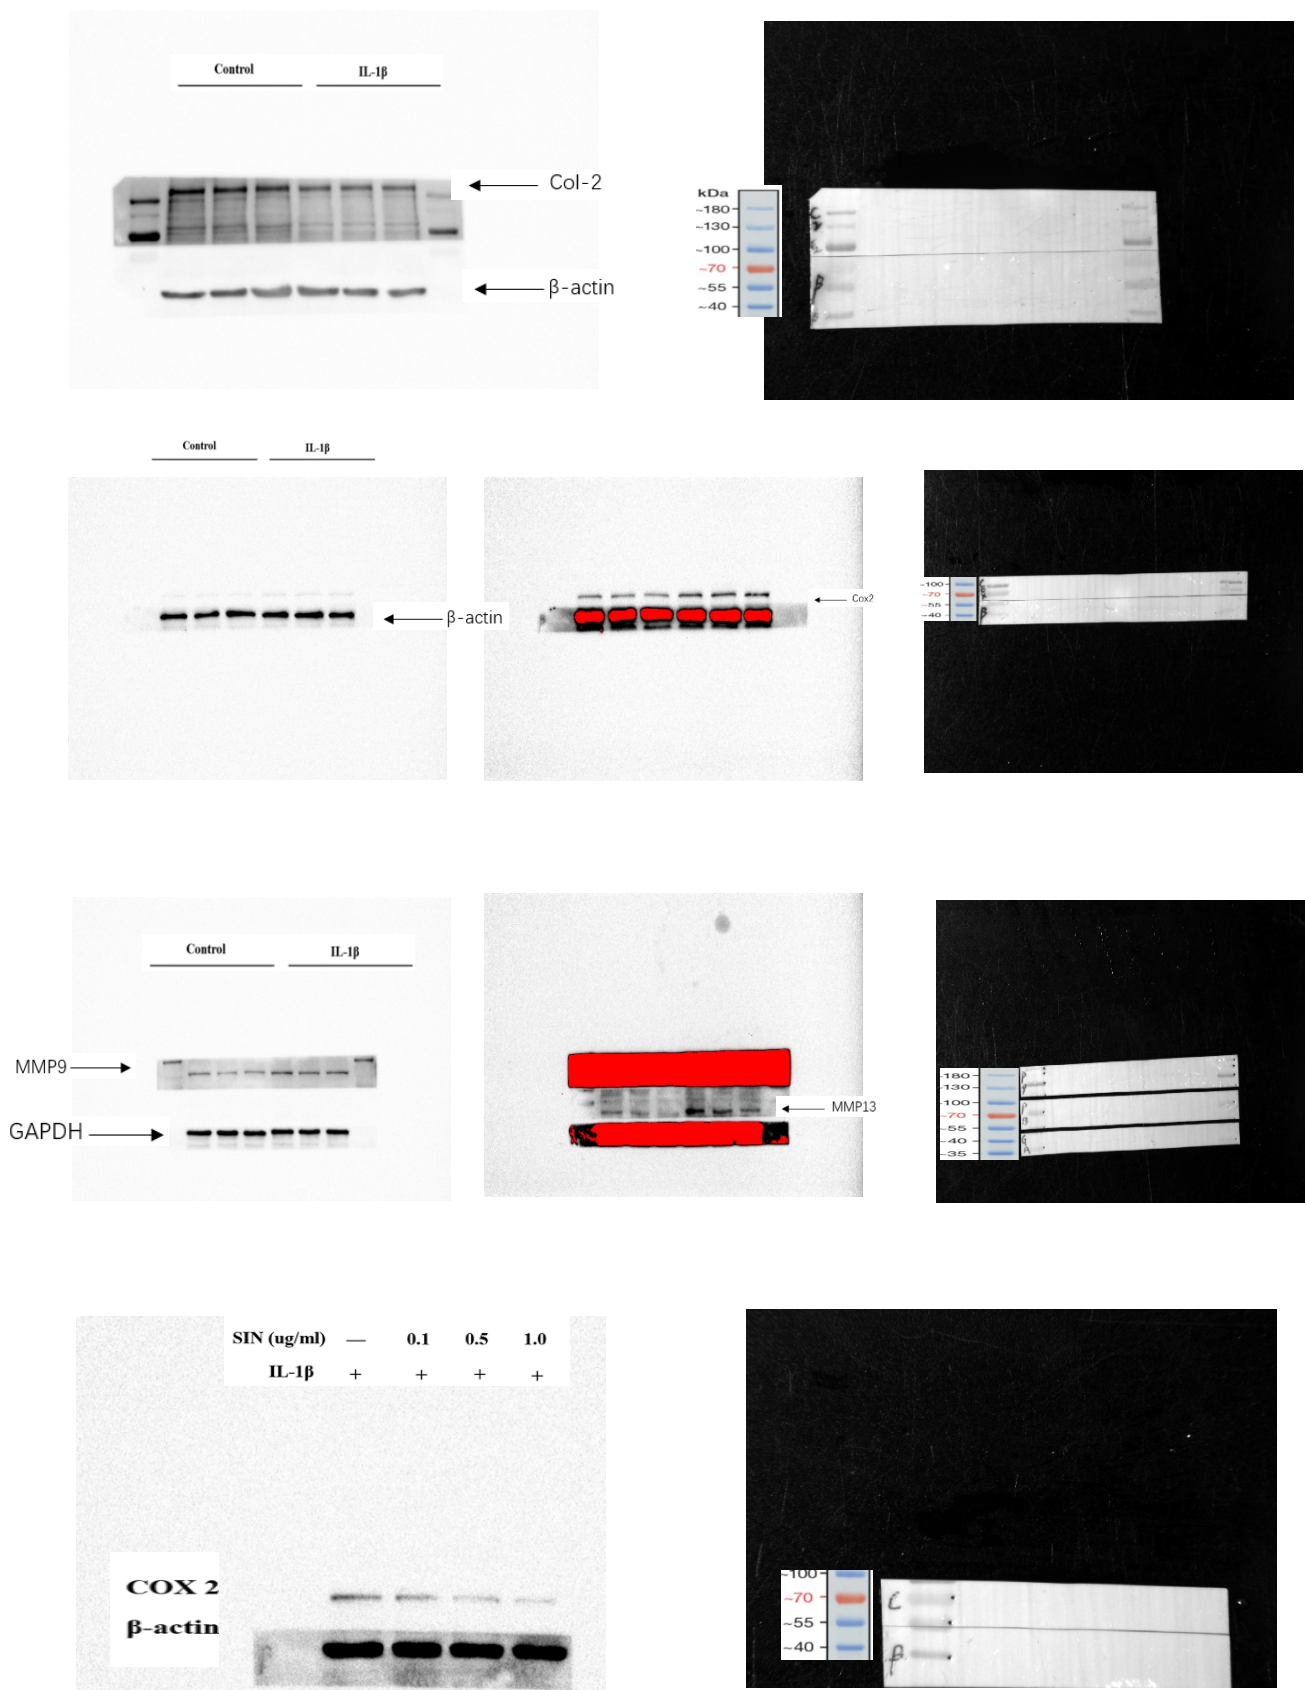

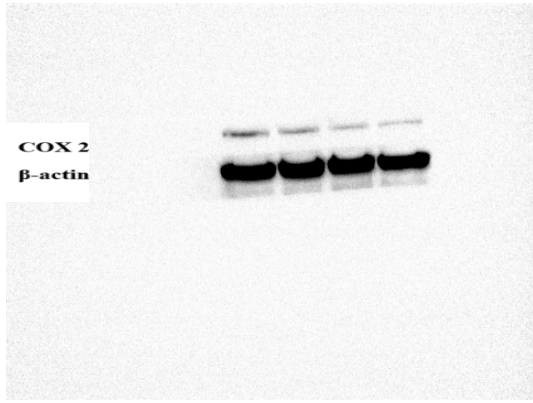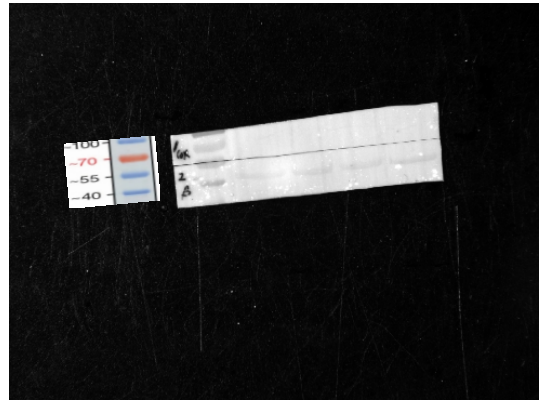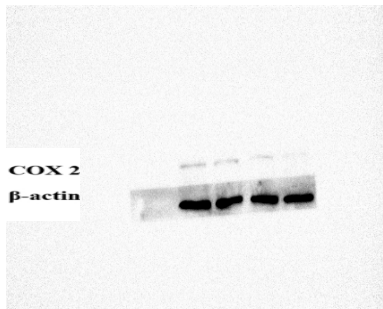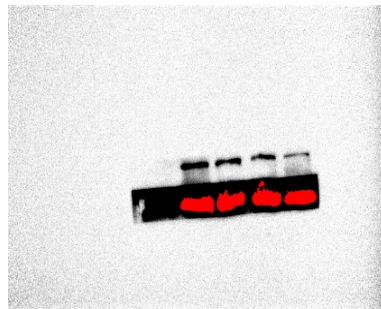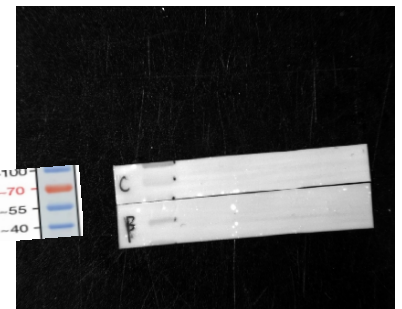

SIN (ug/ml) — 0.1 0.5 1.0  
IL-1β + + + +

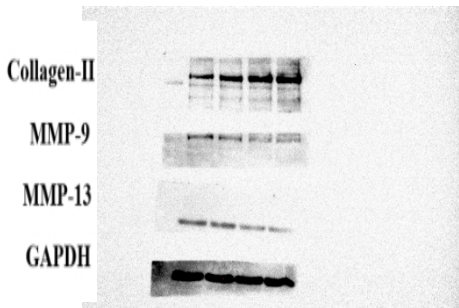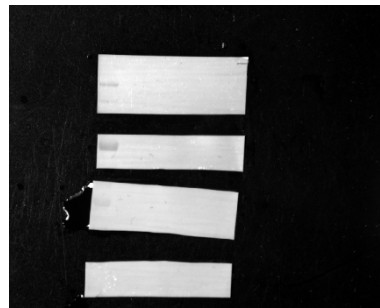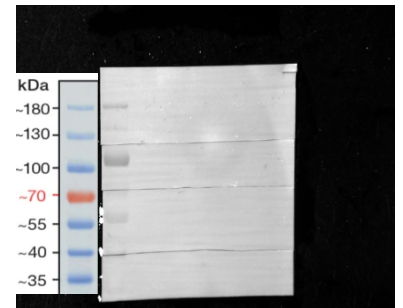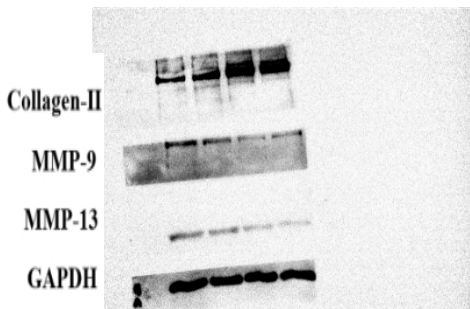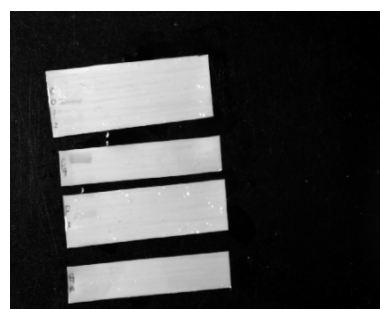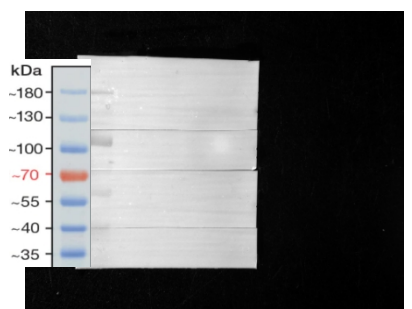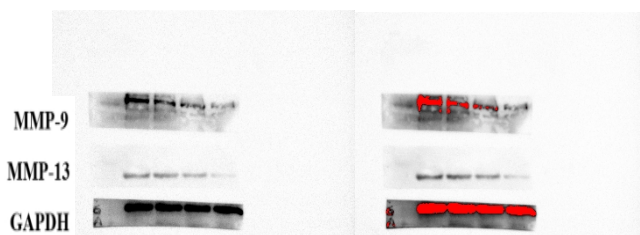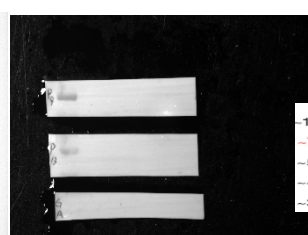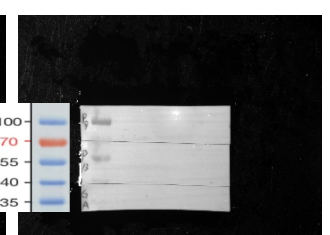

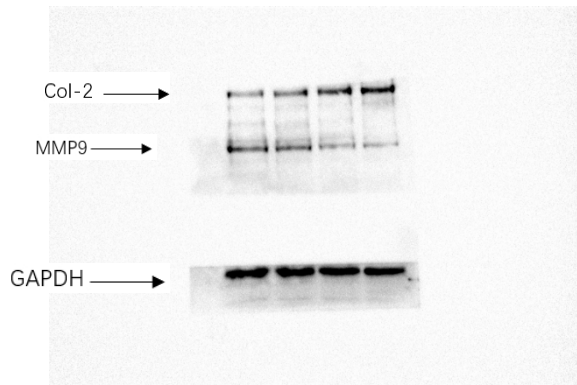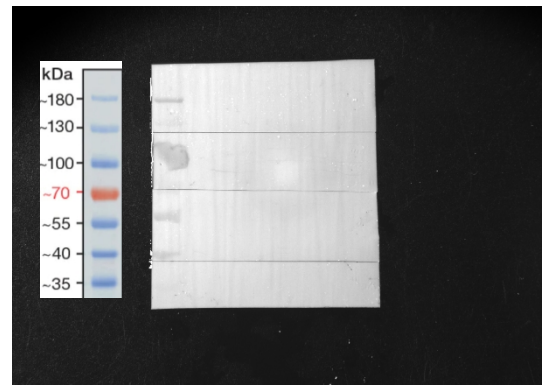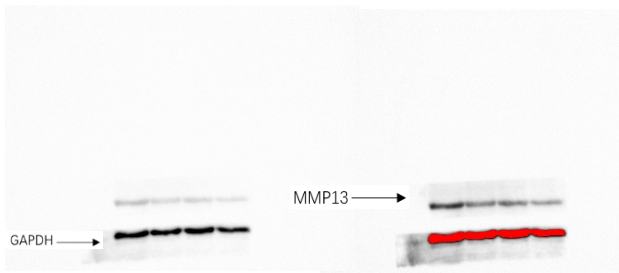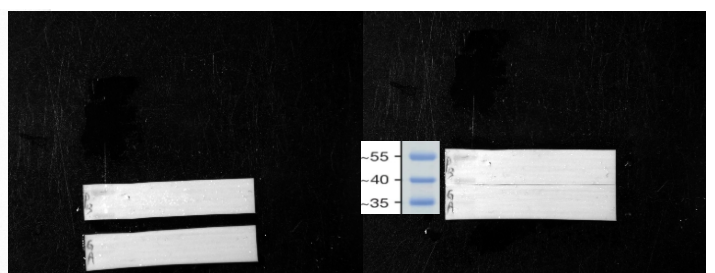

**Fig-5 Western blotting**

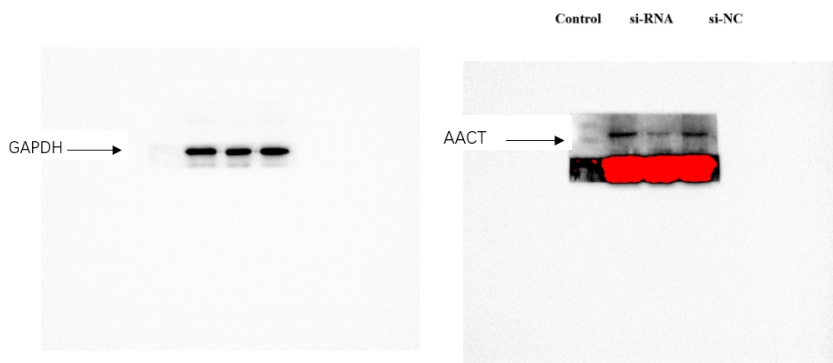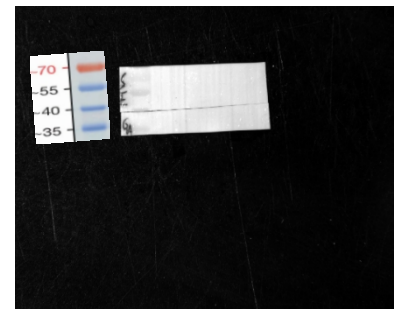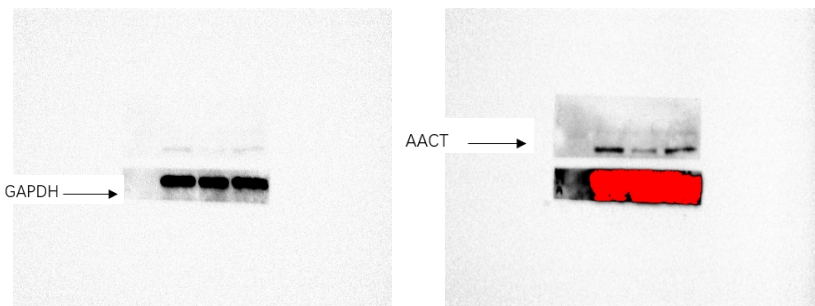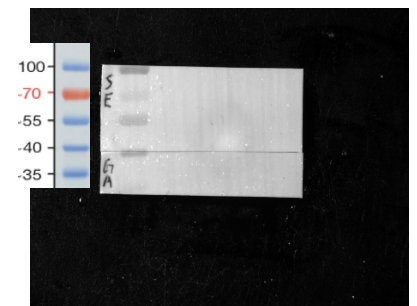

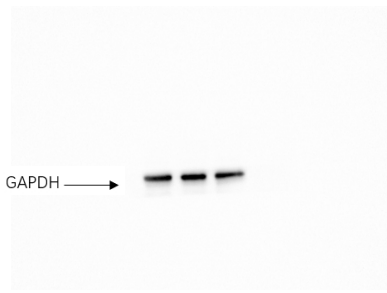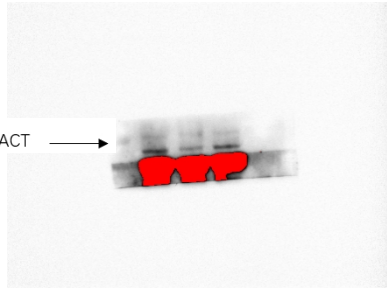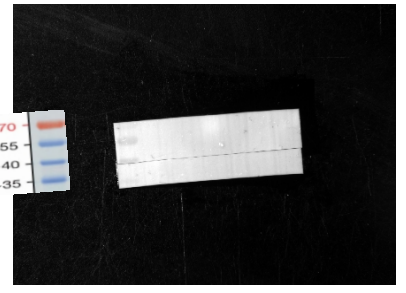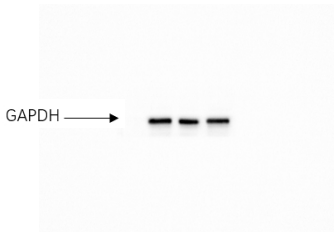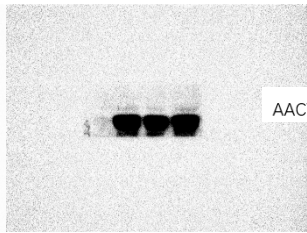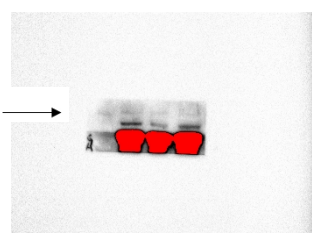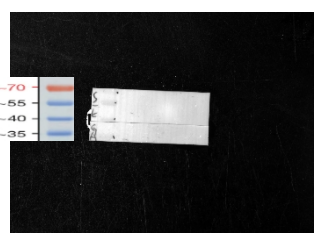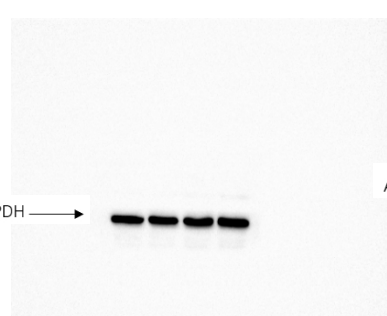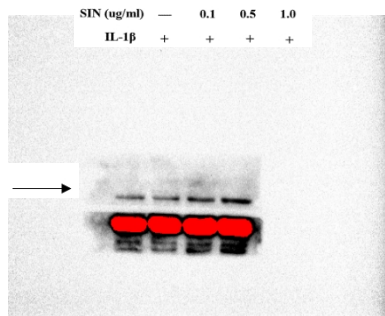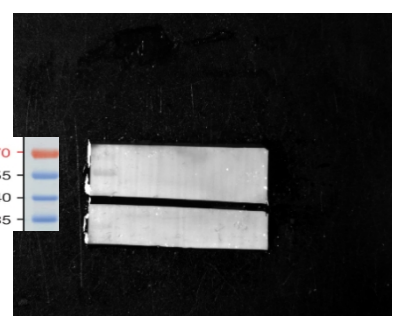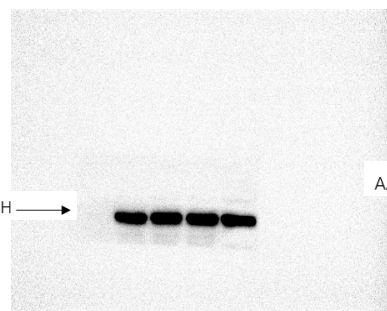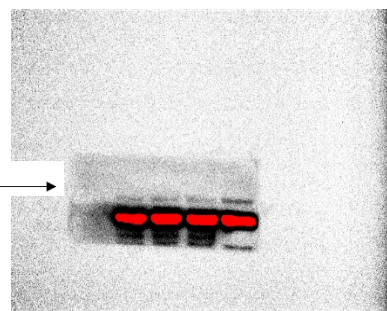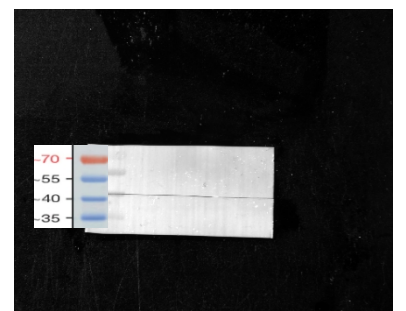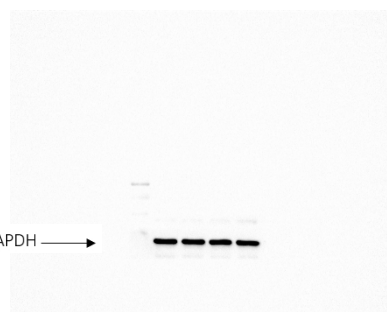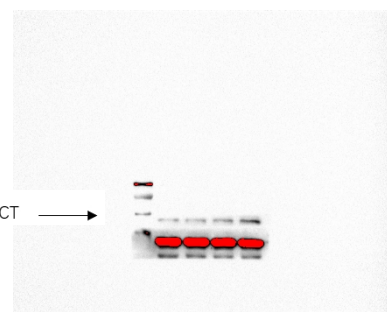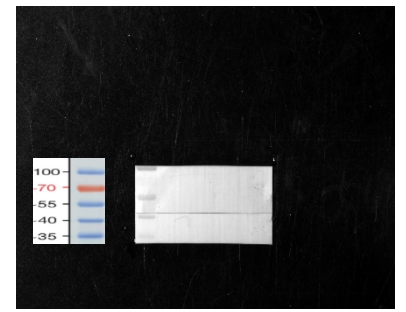

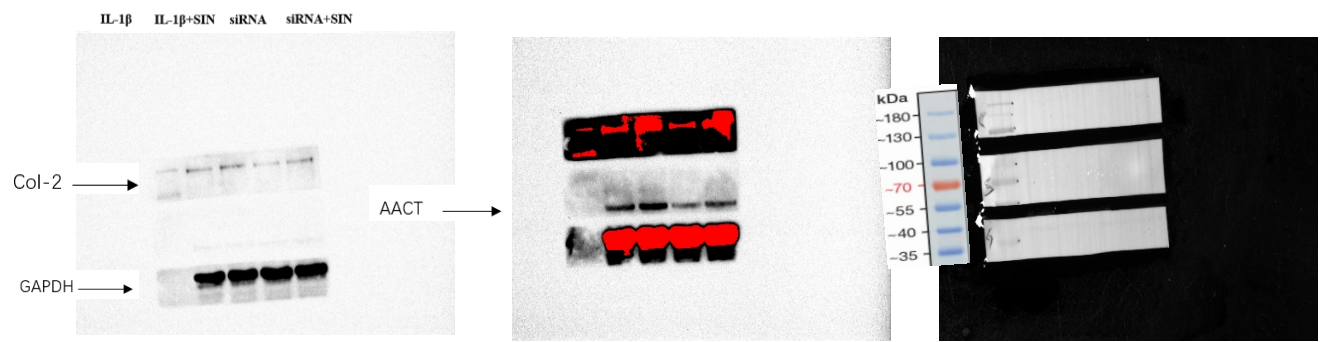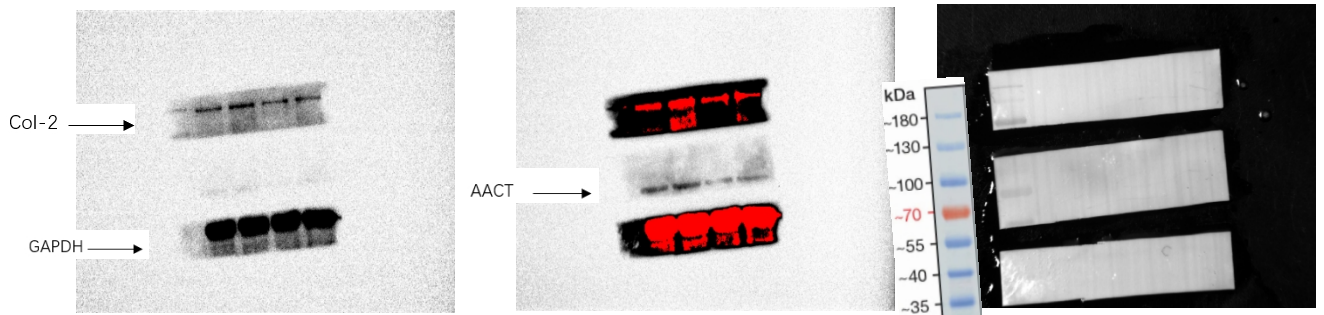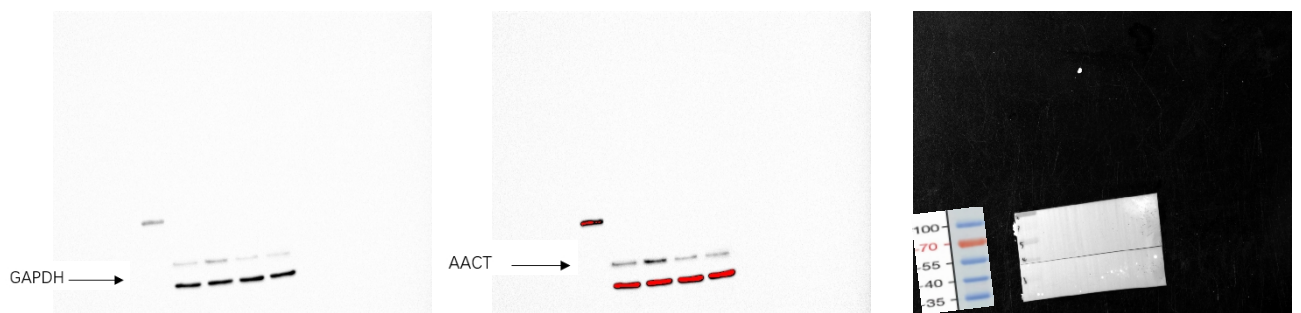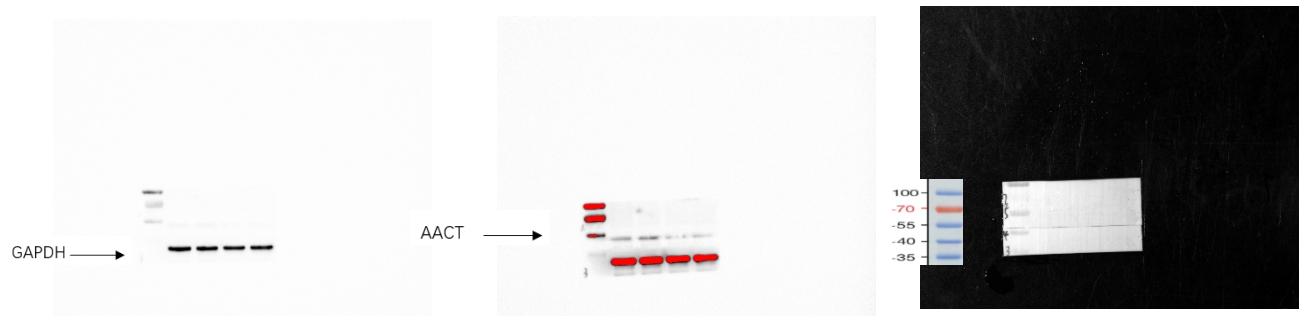

IL-1 $\beta$  IL-1 $\beta$ +SIN siRNA siRNA+SIN

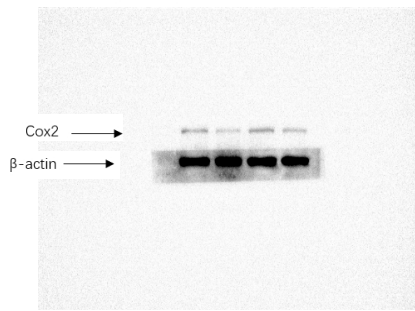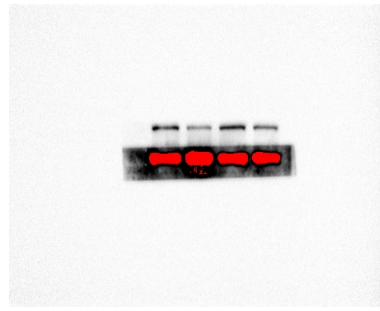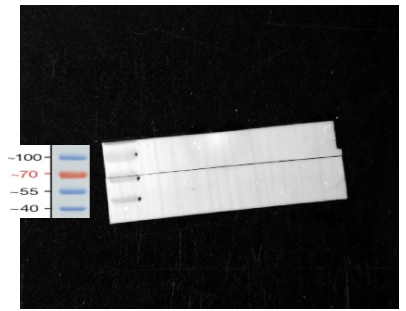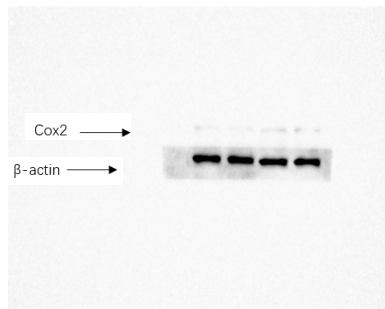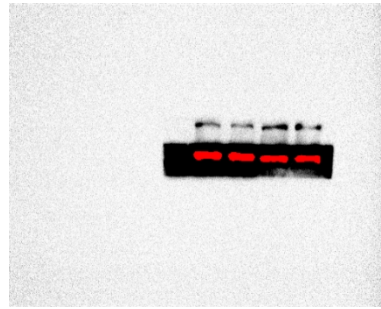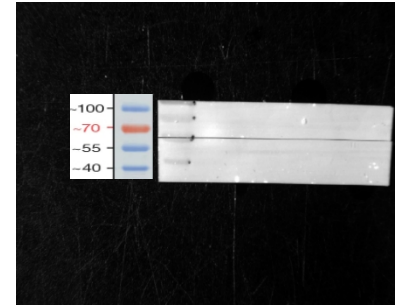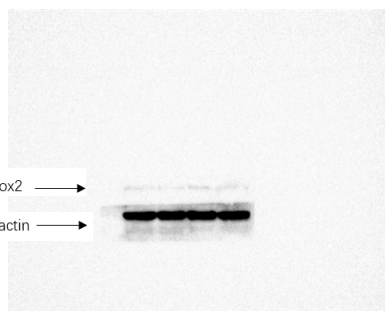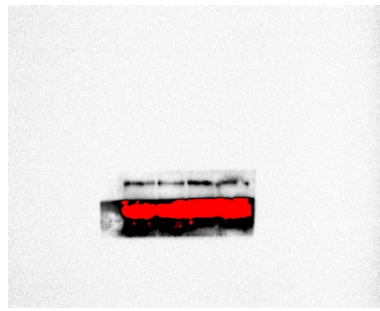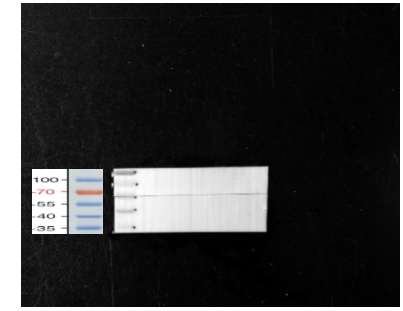

IL-1 $\beta$  IL-1 $\beta$ +SIN siRNA siRNA+SIN

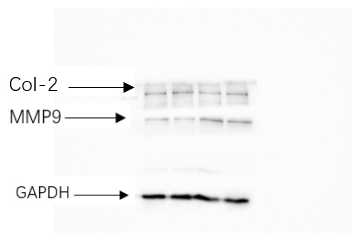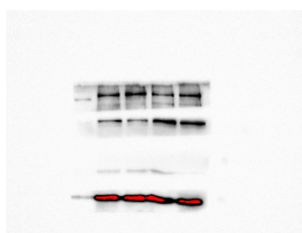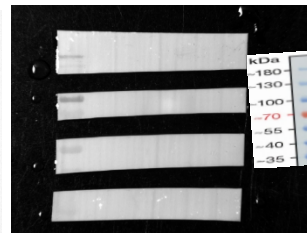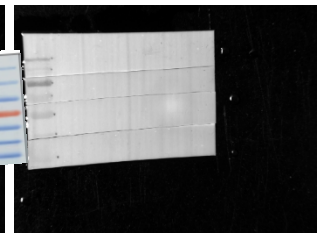

IL-1 $\beta$  IL-1 $\beta$ +SIN siRNA siRNA+SIN

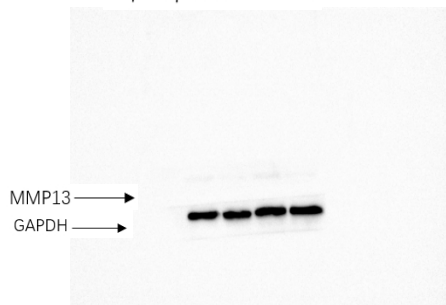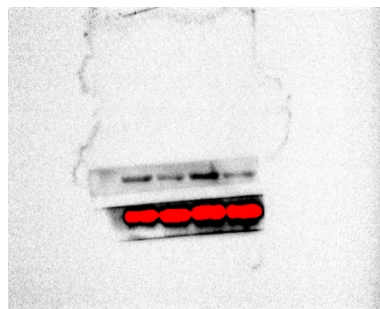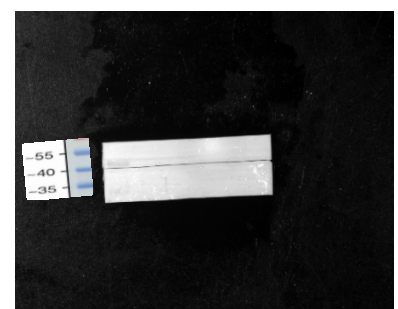

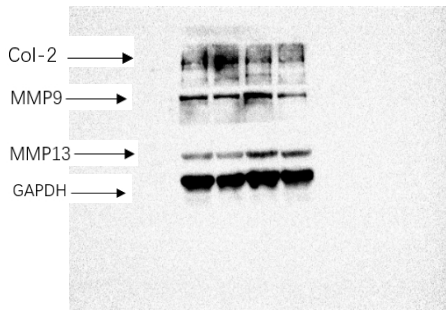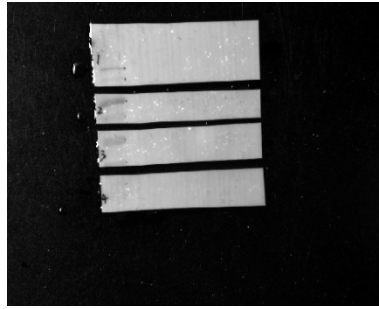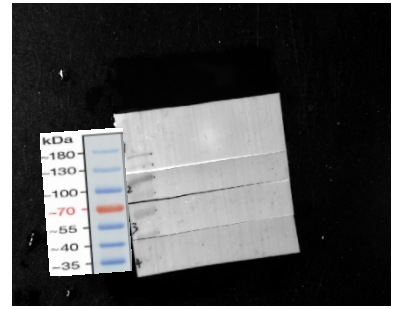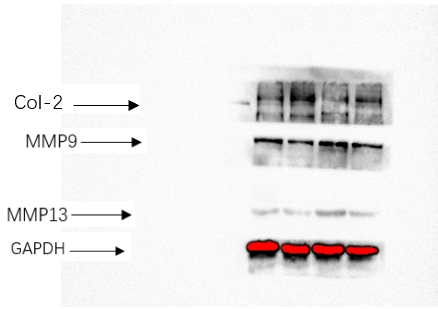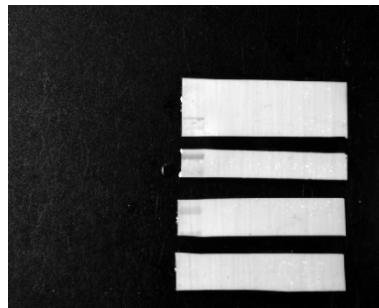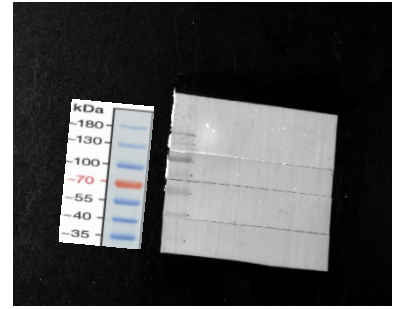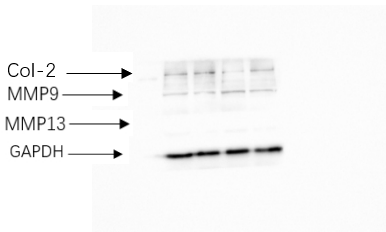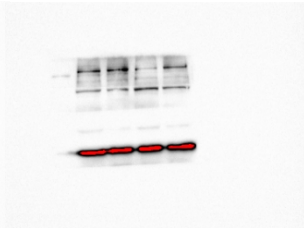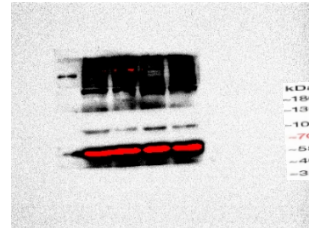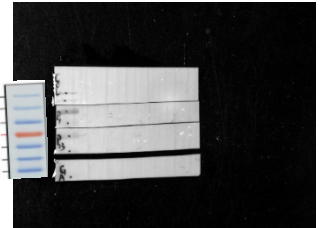

**Fig-6 Western blotting**

SIN (ug/ml) — 0.1 0.5 1.0  
IL-1β + + + +

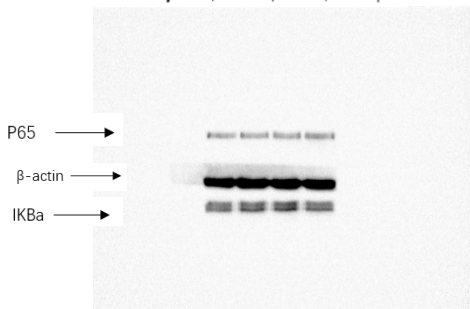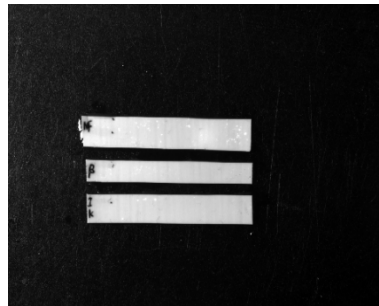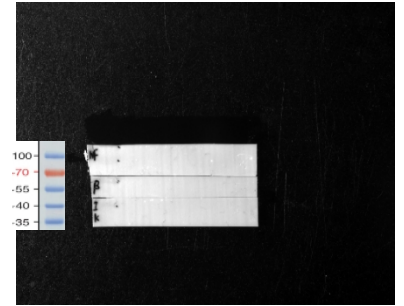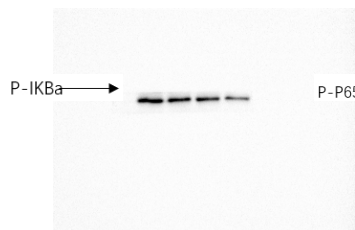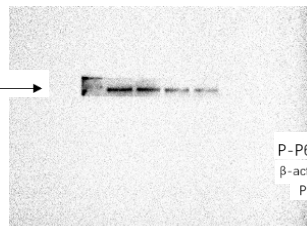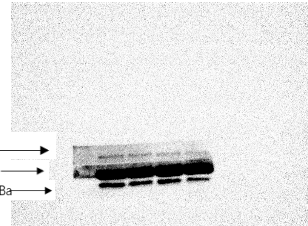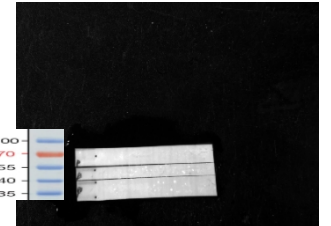

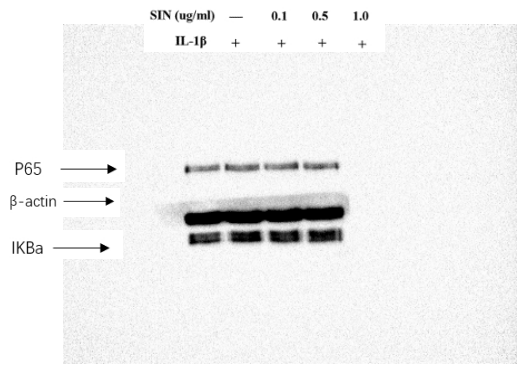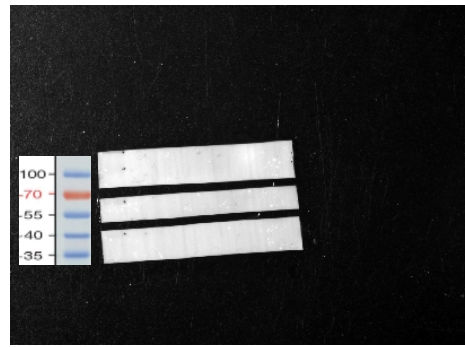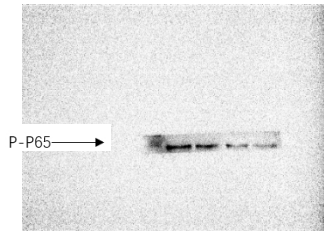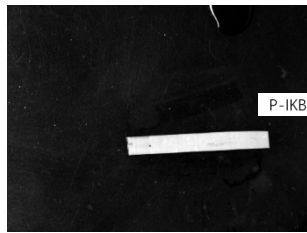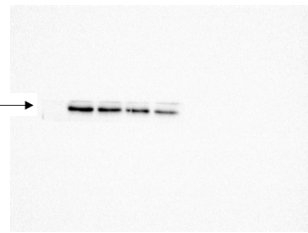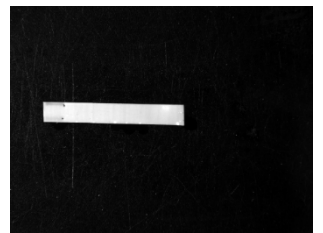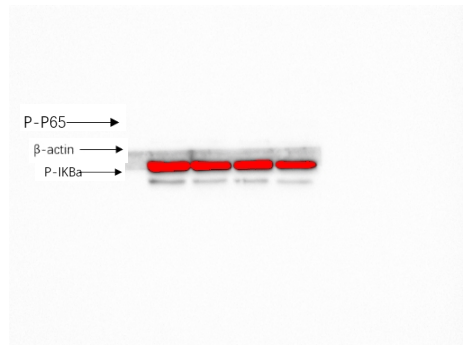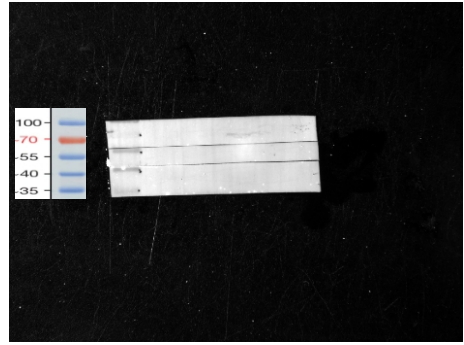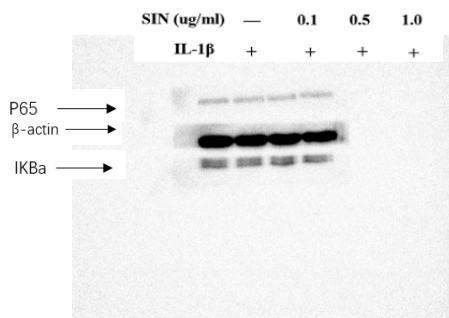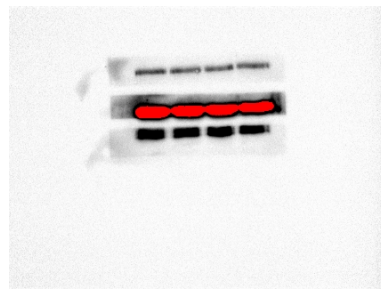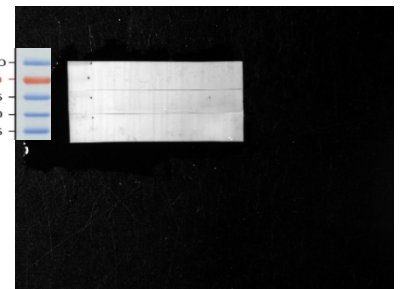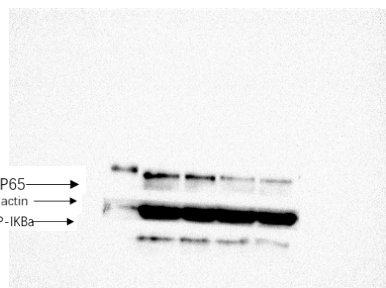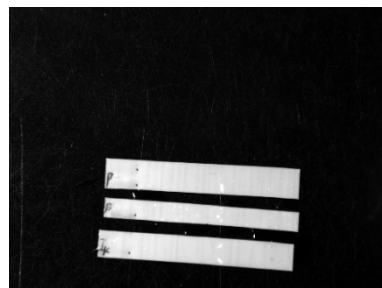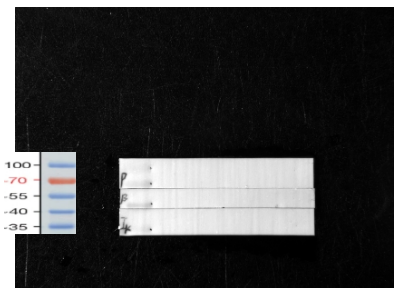



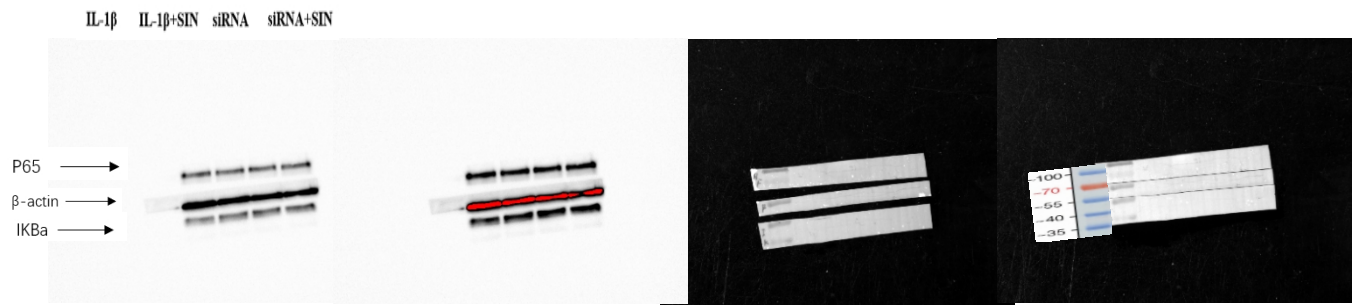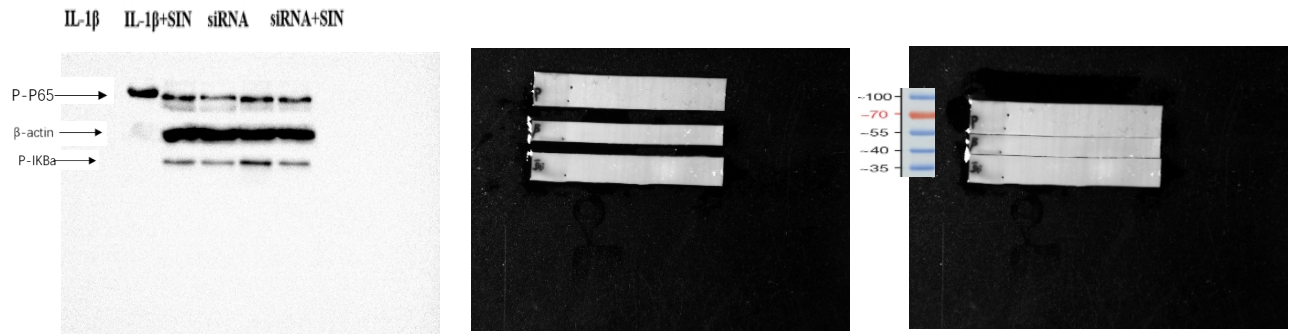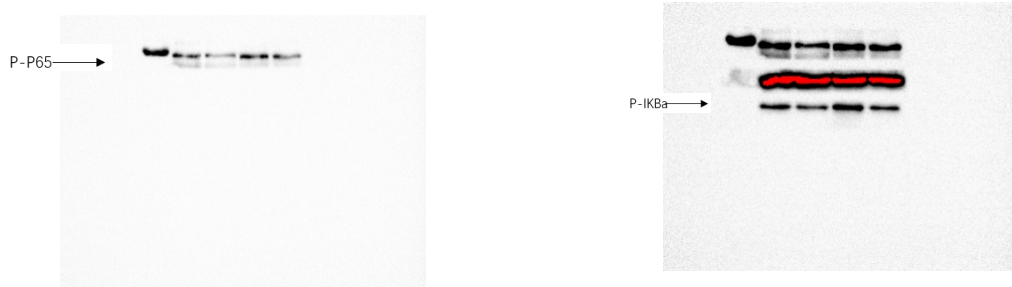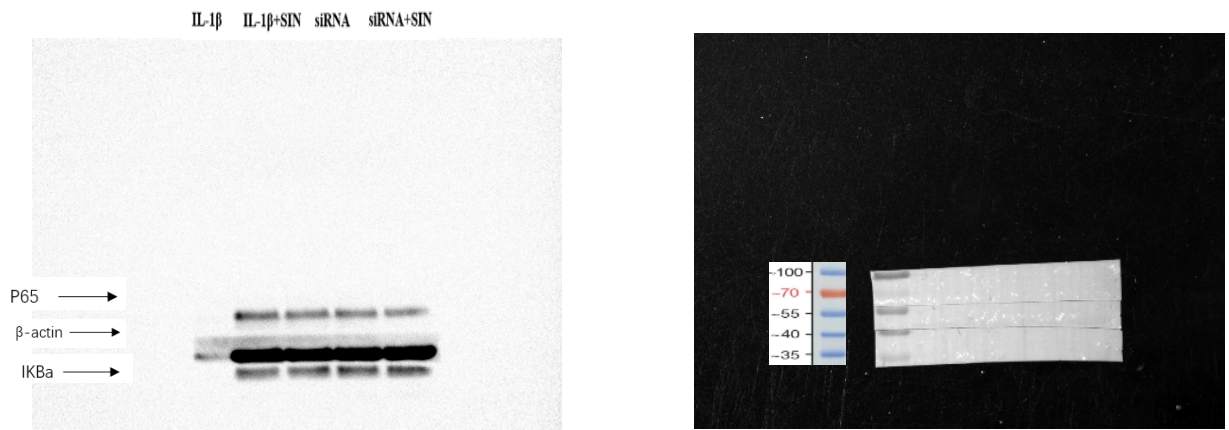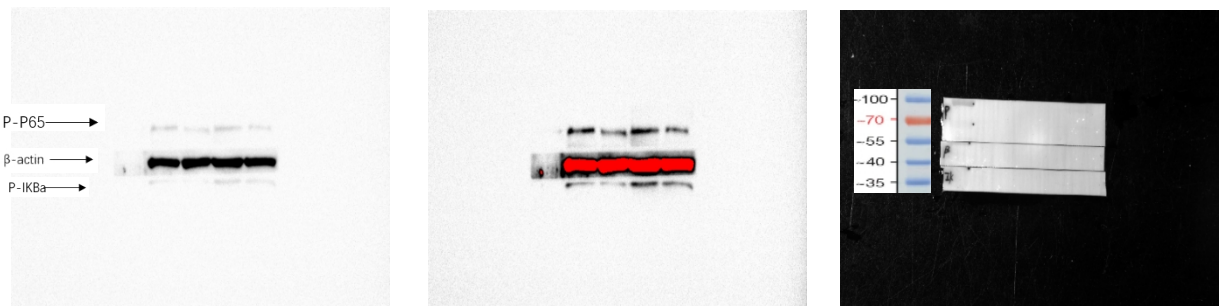

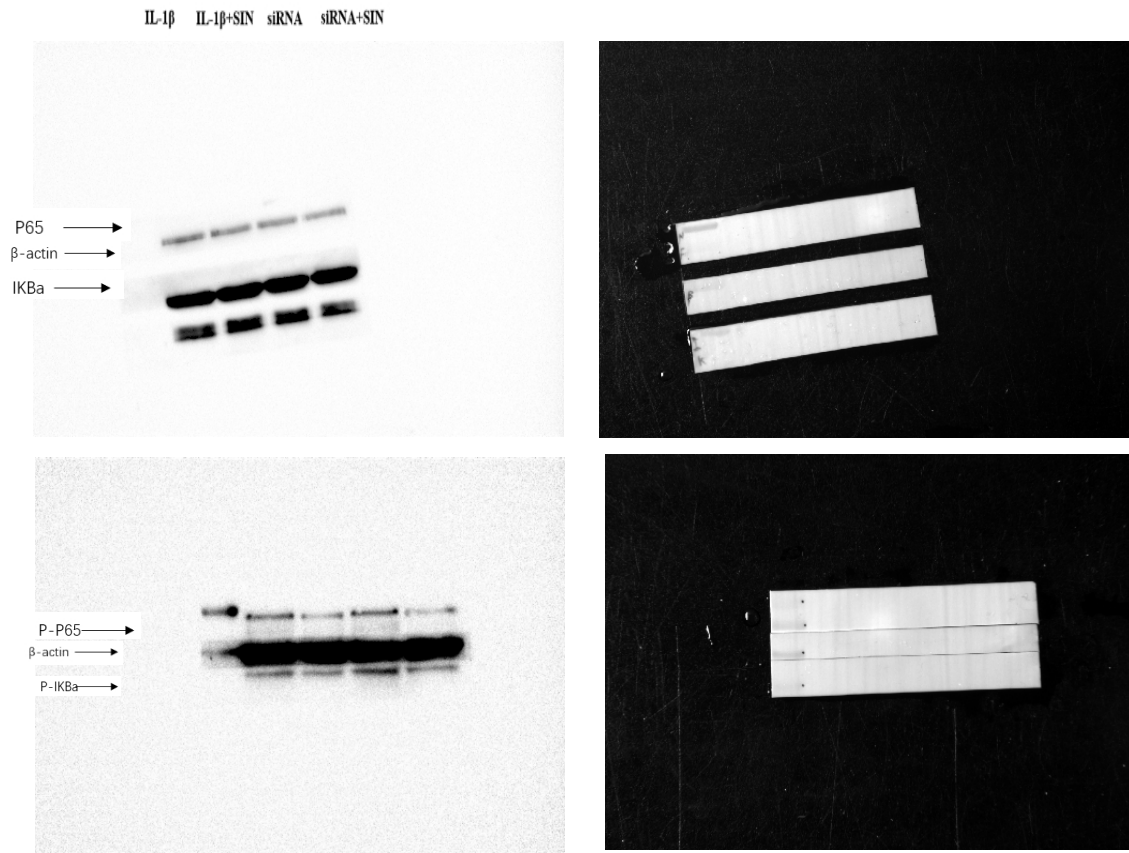

**Fig-7 Western blotting**

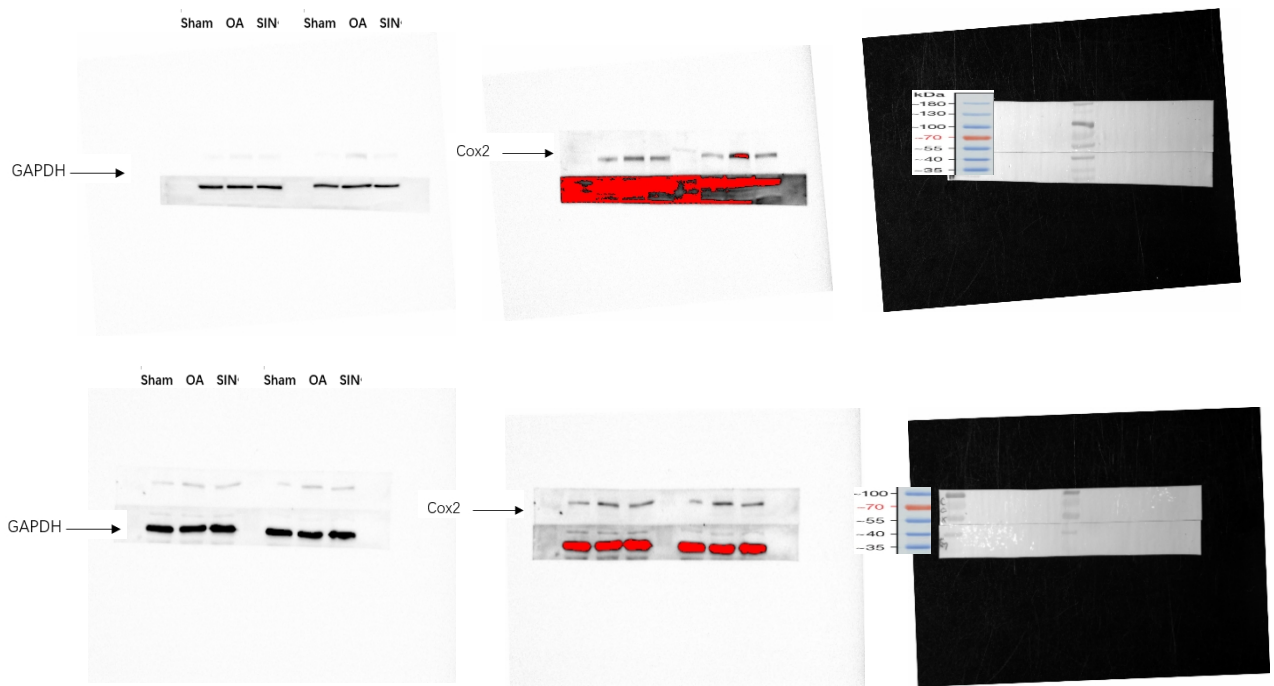

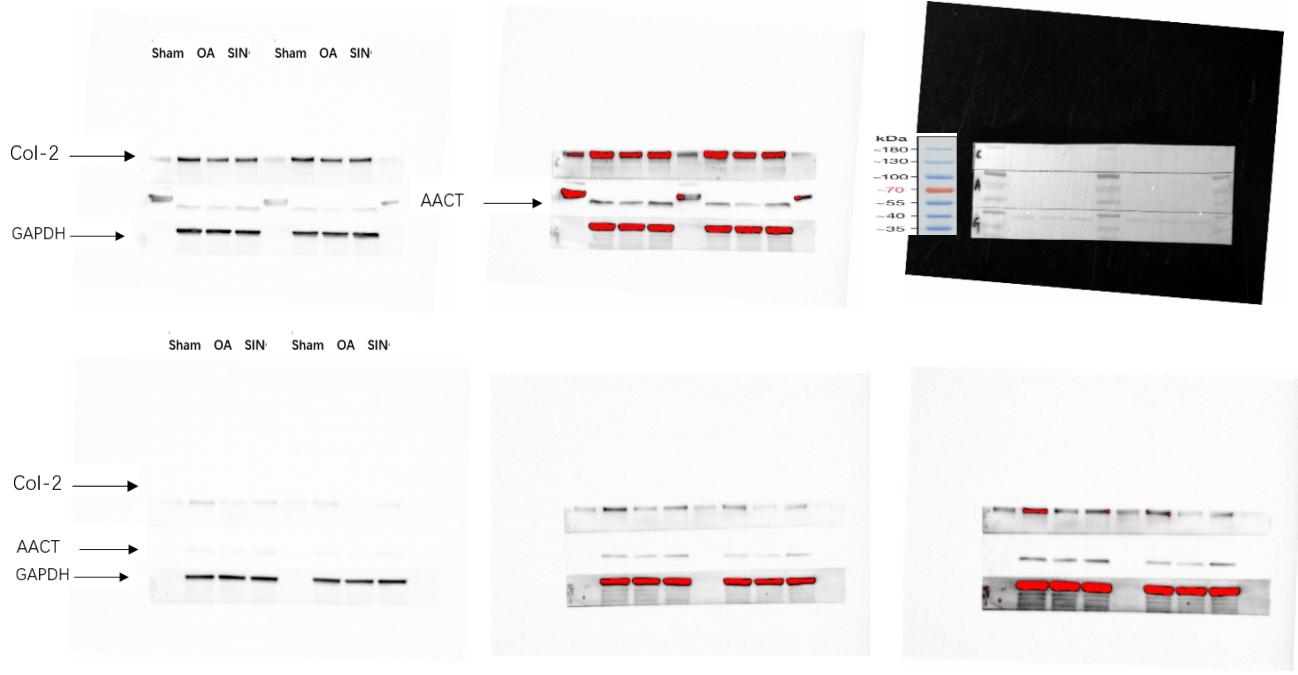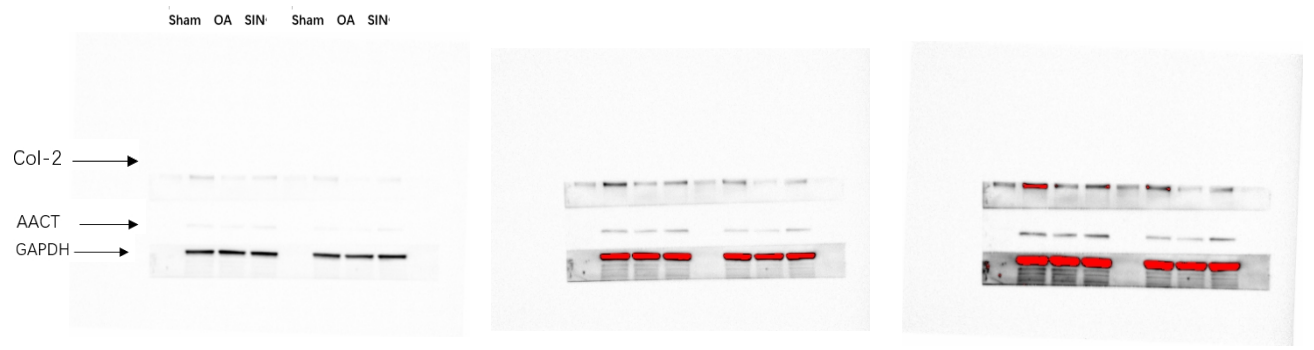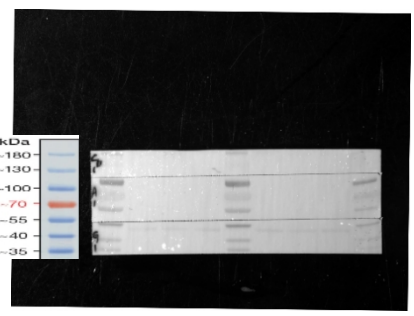

**Supplementary positive control**

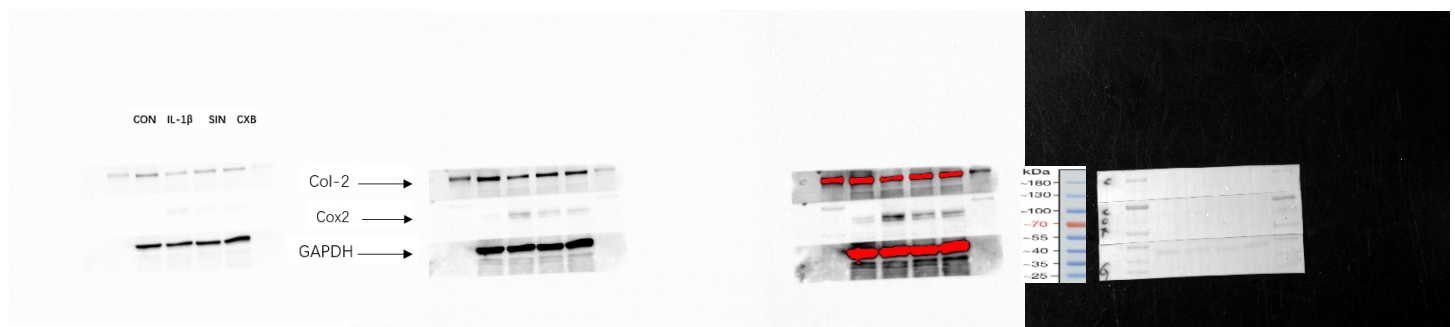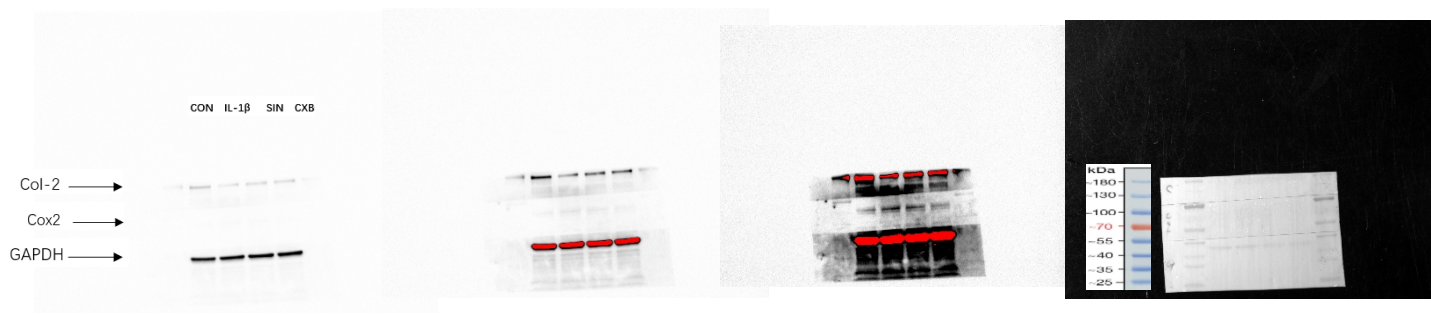

CON IL-1 $\beta$  SIN CXB

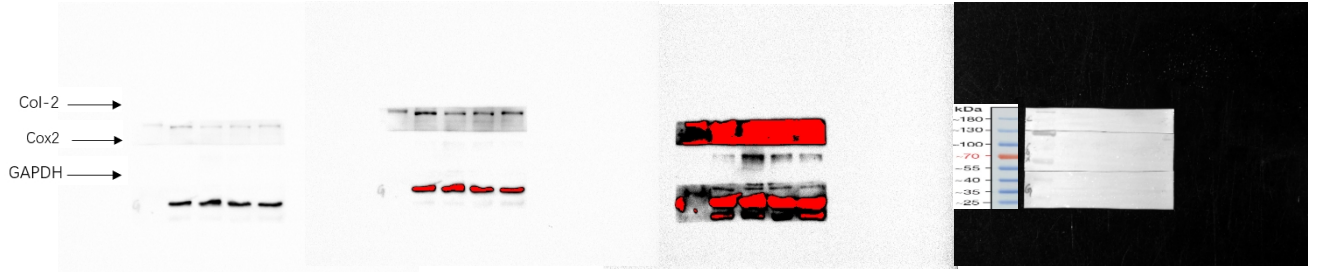

CON IL-1 $\beta$  SIN CXB CON IL-1 $\beta$  SIN CXB

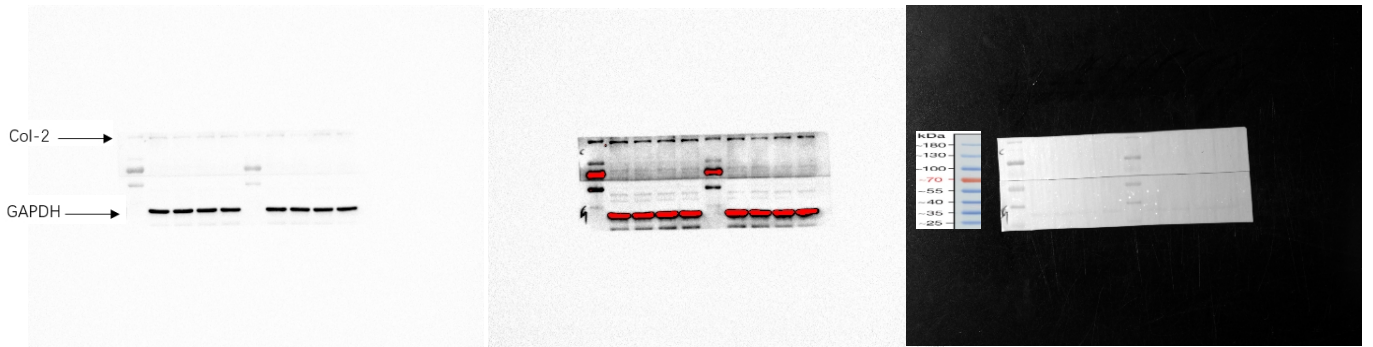

CON IL-1 $\beta$  SIN CXB CON IL-1 $\beta$  SIN CXB

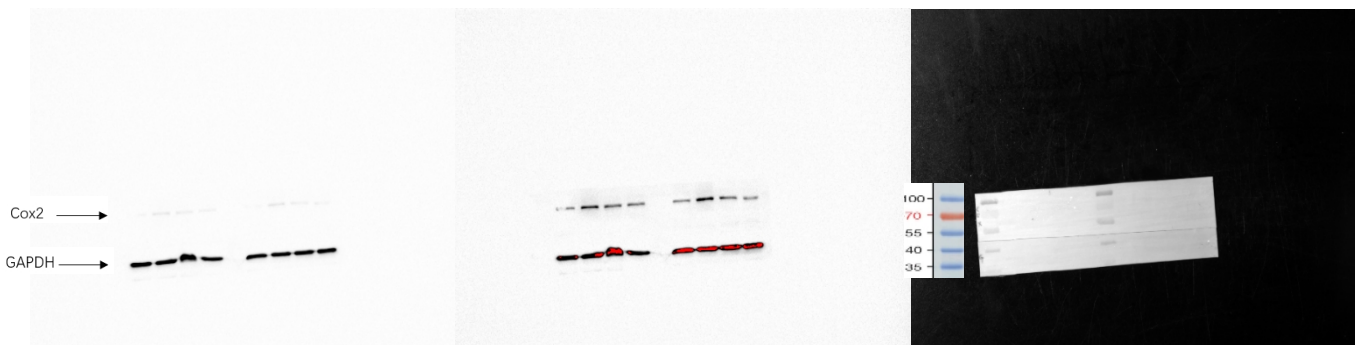

Supplement: d2fo01304e2.pdf [file d2fo01304e2.pdf]
